# Supplementary material for: Placental Adiponectin Gene DNA Methylation Levels Are Associated With Mothers’ Blood Glucose Concentration
Source: PubMed Central journal article supplement — Diabetes. 2012 Apr 13;61(5):1272–80. doi: 10.2337/db11-1160 (PMC3331769; doi:10.2337/db11-1160), 2012-04-13
Supplement: supp_db11-0867_DB110867SupplementaryData.pdf [file supp_db11-0867_DB110867SupplementaryData.pdf]

SUPPLEMENTARY DATA

**Supplementary Table 1.** Forward (F) and reverse (R) primers used for PCR quantification of mRNA transcripts encoding Gapdh, both isoforms of the beta chain constant region, V $\beta$ 9, V $\beta$ 13, V $\beta$ 15, and V $\beta$ 16. Gapdh was used as housekeeping control. Additional details are given in Methods.

| Genetic Element                | Sequence                       |
|--------------------------------|--------------------------------|
| Real-time Primers              |                                |
| Gapdh (F)                      | 5'-GCACCACCAACTGCTTAGCC-3'     |
| Gapdh (R)                      | 5'-CTGAGTGGCAGTGATGGCAT-3'     |
| C $\beta$ (F)                  | 5'-TGCCAAGTGCAGTTCTATGG-3'     |
| C $\beta$ (R)                  | 5'-TTGTTGATAGGATGCTGAGGT-3'    |
| V $\beta$ 4 (F)                | 5'-GTTGCCTGGTCCTCTGTCTC-3'     |
| V $\beta$ 4 (R)                | 5'-TTGTGTCCTAGATGCTGTTTCG-3'   |
| V $\beta$ 9 (F)                | 5'-TGTGATCTTCTGTCTTCTTGCAG-3'  |
| V $\beta$ 9 (R)                | 5'-CACTGGTTTTCCAACCTCTTGC-3'   |
| V $\beta$ 13 (F)               | 5'-GGGCAGTGCTCTGTCTCCT-3'      |
| V $\beta$ 13 (R)               | 5'-TGGGTGACTCCAGTTTCAGA-3'     |
| V $\beta$ 15 (F)               | 5'-TGCTGCTTCTGCTACTTCTGG-3'    |
| V $\beta$ 15 (R)               | 5'-CCTGAACACCCTCAGTGTGAC-3'    |
| V $\beta$ 16 (F)               | 5'-GGCATCCAGACCCTCTGTT-3'      |
| V $\beta$ 16 (R)               | 5'-TGACTCCAGCATCTGCGTTA-3'     |
| V $\beta$ 13 for J $\beta$ (F) | 5'-TTGCTGTGAGGACTGAAGGA-3'     |
| V $\beta$ 16 for J $\beta$ (F) | 5'-CGATGGTAAAATTGGGGAGA-3'     |
| J $\beta$ 1.1 (R)              | 5'-AACTGTCAGTCTCGTTCCTTTACC-3' |
| J $\beta$ 1.2 (R)              | 5'-GGGCCGAAGGTGTAGTCATA-3'     |
| J $\beta$ 1.3 (R)              | 5'-CTTCCTTCACCAAAATAGAGCAC-3'  |
| J $\beta$ 1.4 (R)              | 5'-CATGGCCGAAAAACAATCTT-3'     |
| J $\beta$ 1.5 (R)              | 5'-CCGAGTCCCTTCTCCAAAAT-3'     |
| J $\beta$ 1.6 (R)              | 5'-GTGCCTGCTGCAAAGTAGAG-3'     |
| J $\beta$ 2.1 (R)              | 5'-GTGTCCCTGATCCGAAGAA-3'      |
| J $\beta$ 2.2 (R)              | 5'-CAGCACTGTCAGCTTTGAGC-3'     |
| J $\beta$ 2.3 (R)              | 5'-AACGGTCAGTCTGGTTCCTG-3'     |
| J $\beta$ 2.4 (R)              | 5'-CTGCACCGAAGAACAAGGT-3'      |
| J $\beta$ 2.5 (R)              | 5'-TGCCTGGTCCAAAGTACTGG-3'     |
| J $\beta$ 2.6 (R)              | 5'-CGGGACCGAAATACTGCT-3'       |
| Cloning and Sequencing Primers |                                |
| V $\beta$ 13 Cloning 1 (F)     | 5'-GGGCAGTGCTCTGTCTCCT-3'      |
| V $\beta$ 13 Cloning 1 (R)     | 5'-TTGTTGATAGGATGCTGAGGT-3'    |
| V $\beta$ 13 Cloning 2 (F)     | 5'-TCGACACAGTTCTGTCTGAAAC-3'   |
| V $\beta$ 13 Cloning 2 (R)     | 5'-CCTTGTTTGAGCCATCAGAAGC-3'   |
